# Supplementary material for: Hyperactive Natural Killer cells in Rag2 knockout mice inhibit the development of acute myeloid leukemia
Source: PubMed Central journal article supplement (PMC10739813; doi:10.1038/s42003-023-05606-3), 2023-12-21

# Supplemental Information

Sugimoto E et al. **Hyperactive Natural Killer cells in *Rag2* knockout mice inhibit the development of acute myeloid leukemia**

**Supplementary Table 1, 2, 3. .... 1-2**

**Supplemental Figure 1-4. .... 3-6**

**Supplementary Table 1.** Characters of mouse myeloid leukemia cells used in this study.

| Tumor name    | Oncogene                                   | Strain  | Recipient mice        | Leukemia development                         |
|---------------|--------------------------------------------|---------|-----------------------|----------------------------------------------|
| MLL-AF9       | MLL-AF9                                    | C57BL/6 | non-irradiation       | faster in WT than <i>Rag2</i> <sup>-/-</sup> |
| RUNX1-ETO9a   | RUNX1-ETO9a                                | C57BL/6 | non-irradiation       | faster in WT than <i>Rag2</i> <sup>-/-</sup> |
| cRAM          | RUNX1-S291fsX300 and ASXL1-p.E635RfsX15 KI | C57BL/6 | sublethal irradiation | faster in <i>Rag2</i> <sup>-/-</sup> than WT |
| cSAM-original | SETBP1-D868N and ASXL1-E635RfsX15          | C57BL/6 | sublethal irradiation | faster in <i>Rag2</i> <sup>-/-</sup> than WT |
| cSAM-2020     | SETBP1-D868N and ASXL1-E635RfsX15          | C57BL/6 | non-irradiation       | faster in WT than <i>Rag2</i> <sup>-/-</sup> |

WT: Wild-type mice, *Rag2*<sup>-/-</sup>: *Rag2* knockout mice

**Supplementary Table 2.** Lists of antibodies used in this study.

| Antibody                                               | Clone        | SOURCE                    | IDNENTIFIER    | Dilution     |
|--------------------------------------------------------|--------------|---------------------------|----------------|--------------|
| APC-conjugated anti-mouse NK1.1                        | PK136        | BioLegend                 | Cat#108710     | 1:400        |
| APC anti-mouse CD107a (LAMP-1) Antibody                | 1D4B         | BioLegend                 | Cat#121614     | 1:400, 1:100 |
| APC anti-mouse IFN- $\gamma$ Antibody                  | XMG1.2       | BioLegend                 | Cat#505810     | 1:100        |
| APC anti-mouse CD274 (B7-H1, PD-L1) Antibody           | 10F.9G2      | BioLegend                 | Cat#124311     | 1:400        |
| APC/Cy7-conjugated anti-mouse CD45.1                   | A20          | BioLegend                 | Cat#110716     | 1:400        |
| PE-conjugated anti-mouse NK1.1                         | PK136        | eBioscience               | Cat#12-5941-83 | 1:400        |
| PE-conjugated anti-mouse CD3e                          | 145-2C11     | eBioscience               | Cat#12-0031-85 | 1:400        |
| PE Rat Anti-Mouse CD47                                 | miap301      | BD Biosciences            | Cat#563585     | 1:400        |
| PE Rat Anti-Mouse Ly-6A/E (Sca1)                       | E13-161.7    | BD Pharmingen             | Cat#553336     | 1:400        |
| PE anti-mouse CD155 (PVR) Antibody                     | TX56         | BioLegend                 | Cat#131507     | 1:400        |
| PE Hamster Anti-Mouse CD54 (ICAM-1)                    | 3E2          | BD Pharmingen             | Cat#553253     | 1:400        |
| PE Mouse Anti-Mouse H-2Kb                              | AF6-88.5     | BD Biosciences            | Cat#553570     | 1:400        |
| PE Mouse Anti-Mouse Qa-1(b)                            | 6A8_6F10_1A6 | BD Pharmingen             | Cat#566640     | 1:400        |
| PE/Cyanine7 anti-mouse CD117 (c-Kit) Antibody          | 2B8          | BioLegend                 | Cat#105814     | 1:400        |
| PE/Cy7-conjugated anti-mouse CD3e                      | 145-2C11     | BioLegend                 | Cat#552774     | 1:400        |
| PE/Cyanine7 anti-mouse CD69 Antibody                   | H1.2F3       | BioLegend                 | Cat#104511     | 1:400        |
| CD49b (Integrin alpha 2) Monoclonal Antibody (DX5), PE | DX5          | eBioscience               | Cat#12-5971-83 | 1:400        |
| CD48 Monoclonal Antibody (HM48-1), PE,                 | HM48-1       | eBioscience               | Cat#12-0481-81 | 1:400        |
| CD273 (B7-DC) Monoclonal Antibody (TY25), PE           | TY25         | eBioscience               | Cat#12-5986-81 | 1:400        |
| Mouse Rae-1 Pan Specific PE-conjugated Antibody        | 186107       | R&D Systems               | Cat#FAB17582P  | 1:400        |
| Mouse ULBP-1/MULT-1 APC-conjugated Antibody            | 237104       | R&D Systems               | Cat#FAB2588A   | 1:400        |
| Armenian Hamster IgG Isotype Control (eBio299Arm), PE  | eBio299Am    | eBioscience               | Cat#12-4888-83 | 1:400        |
| PE Mouse IgG1, $\kappa$ Isotype Control                | X40          | BD Biosciences            | Cat#349043     | 1:400        |
| Rat IgG2a kappa Isotype Control (eBR2a), PE            | eBM2a        | eBioscience               | Cat#12-4321-83 | 1:400        |
| Rat IgG2b kappa Isotype Control (eB149/10H5), PE       | eB149/10H5   | eBioscience               | Cat#12-4031-83 | 1:400        |
| Rat IgG2a kappa Isotype Control (eBR2a), APC           | eBR2a        | eBioscience               | Cat#17-4321-81 | 1:400        |
| Rat IgG2b kappa Isotype Control (eB149/10H5), APC      | eB149/10H5   | eBioscience               | Cat#17-4031-82 | 1:400        |
| NK1.1/CD161 (E6Y9G) Rabbit mAb                         | E6Y9G        | Cell Signaling Technology | Cat#39197      | 1:400        |

**Supplementary Table 3.** Actual p-values used in the Figures.

| Figure No.           |   | comparison                       | p value | sign            | test                               |
|----------------------|---|----------------------------------|---------|-----------------|------------------------------------|
| Figure1              | b | WT-Rag2-/-                       | 0.0306  | *               | Log-rank                           |
| Figure1              | b | WT_NSG                           | 0.0074  | **              | Log-rank                           |
| Figure1              | c | GFP+ cells number                | 0.0022  | **              | Mann Whitney test                  |
| Figure1              | d | spleen (g)                       | 0.0001  | ***             | Student's t test                   |
| Figure1              | d | spleen (cm)                      | <0.0001 | ****            | Student's t test                   |
| Figure1              | e | WT-DS_Rag-DS                     | 0.0223  | *               | Log-rank                           |
| Figure2              | d | Exp.1                            | 0.0036  | **              | Student's t test                   |
| Figure2              | d | Exp.2                            | <0.0001 | ****            | Student's t test                   |
| Figure3              | d | Rag2_NT-sg1                      | <0.0001 | ****            | Tukey's multiple comparison test   |
| Figure3              | d | Rag2_NT-sg2                      | <0.0001 | ****            | Tukey's multiple comparison test   |
| Figure3              | d | WT_NT-sg1                        | 0.0022  | **              | Mann Whitney test                  |
| Figure3              | d | NSG_NT-sg1                       | 0.3095  | not significant | Mann Whitney test                  |
| Figure3              | f | NT-sg1                           | 0.0187  | *               | Dunnett's multiple comparison test |
| Figure3              | f | NT-sg2                           | 0.0007  | ***             | Dunnett's multiple comparison test |
| Figure4              | a | PB                               | 0.0022  | **              | Mann Whitney test                  |
| Figure4              | a | BM                               | 0.0040  | **              | Mann Whitney test                  |
| Figure4              | a | Spleen                           | 0.0040  | **              | Mann Whitney test                  |
| Figure4              | b | CD107a                           | 0.0040  | **              | Mann Whitney test                  |
| Figure4              | b | CD69                             | 0.0061  | **              | Mann Whitney test                  |
| Figure4              | b | Sca-1                            | 0.0040  | **              | Mann Whitney test                  |
| Figure4              | c | NK ratio=1                       | 0.0004  | ***             | Student's t test                   |
| Figure4              | c | NK ratio=3                       | 0.0053  | **              | Student's t test                   |
| Figure4              | c | NK ratio=10                      | 0.0004  | ***             | Student's t test                   |
| Figure4              | c | NK ratio=30                      | 0.0194  | *               | Student's t test                   |
| Figure4              | d | CD107a_WT (-)-YAC-1              | <0.0001 | ****            | Tukey's multiple comparison test   |
| Figure4              | d | CD107a_WT_YAC-1 - Rag2_YAC-1     | <0.0001 | ****            | Tukey's multiple comparison test   |
| Figure4              | d | CD107a_Rag2 (-)-YAC-1            | <0.0001 | ****            | Tukey's multiple comparison test   |
| Figure4              | e | IFN $\gamma$ _WT (-) - (+)       | <0.0001 | ****            | Tukey's multiple comparison test   |
| Figure4              | e | IFN $\gamma$ _WT (+) - Rag2 (+)  | 0.0117  | *               | Tukey's multiple comparison test   |
| Figure4              | e | IFN $\gamma$ _Rag2 (-) - (+)     | <0.0001 | ****            | Tukey's multiple comparison test   |
| Figure4              | h | Rag_IgG-anti-NK1.1               | 0.0006  | ***             | Log-rank                           |
| Figure5              | a | 9a_WT_DS-Rag2_DS                 | 0.0050  | **              | Log-rank                           |
| Figure5              | a | GFP (%)_WT-Rag2                  | 0.0022  | **              | Mann Whitney test                  |
| Figure5              | b | cRAM_WT-Rag2                     | 0.0118  | *               | Log-rank                           |
| Figure5              | b | GFP (%)_WT-Rag2                  | 0.0390  | *               | Mann Whitney test                  |
| Figure5              | c | survival_WT/vehicle-Rag2/vehicle | 0.0443  | *               | Log-rank                           |
| Figure5              | c | survival_WT/DS-Rag2/DS           | 0.0239  | *               | Log-rank                           |
| Figure5              | c | GFP (%)_WT-Rag2                  | 0.0043  | **              | Mann Whitney test                  |
| Figure5              | d | survival_cSAM-2020               | 0.0010  | **              | Log-rank                           |
| Figure5              | d | GFP (%)_WT-Rag2                  | 0.0022  | **              | Mann Whitney test                  |
| Figure6              | b | survival_MLL-AF9-2021            | 0.0061  | **              | Log-rank                           |
| Figure6              | b | GFP (%)_WT-Rag2                  | 0.0003  | ***             | Mann Whitney test                  |
| Figure6              | c | survival_MLL-AF9-2022            | 0.1447  | not significant | Log-rank                           |
| Figure6              | c | GFP (%)_WT-Rag2                  | 0.0111  | *               | Mann Whitney test                  |
| Supplemental Figure2 | a | PB_WT-Rag2-/-                    | 0.0022  | **              | Mann Whitney test                  |
| Supplemental Figure2 | a | BM_WT-Rag2-/-                    | 0.0040  | **              | Mann Whitney test                  |
| Supplemental Figure2 | a | Spleen_WT-Rag2-/-                | 0.0040  | **              | Mann Whitney test                  |

## Supplemental Figure 1

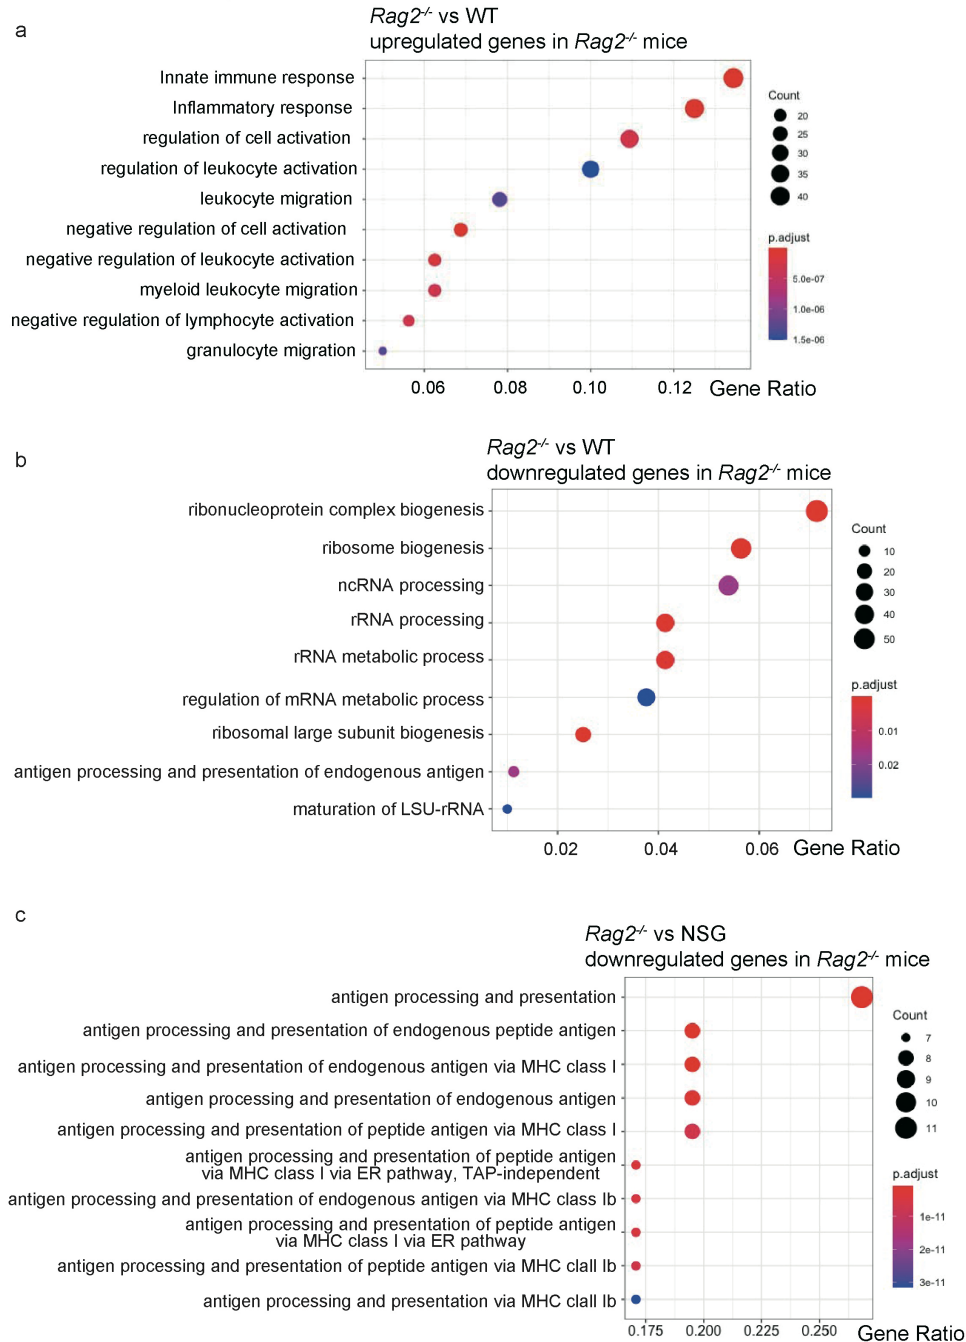

(Relates to Figure 2b)

**a.** GO analysis of upregulated genes in MLL-AF9 AML cells collected from *Rag2<sup>-/-</sup>* mice compared with those from wild-type (WT) C57BL/6 mice. Inflammation- and immune-related genes were upregulated in MLL-AF9 cells collected from *Rag2<sup>-/-</sup>* mice. **b, c.** GO analysis of downregulated genes in MLL-AF9 AML cells collected from *Rag2<sup>-/-</sup>* mice compared with those from WT (**b**) or NSG (**c**) mice.

## Supplemental Figure 2

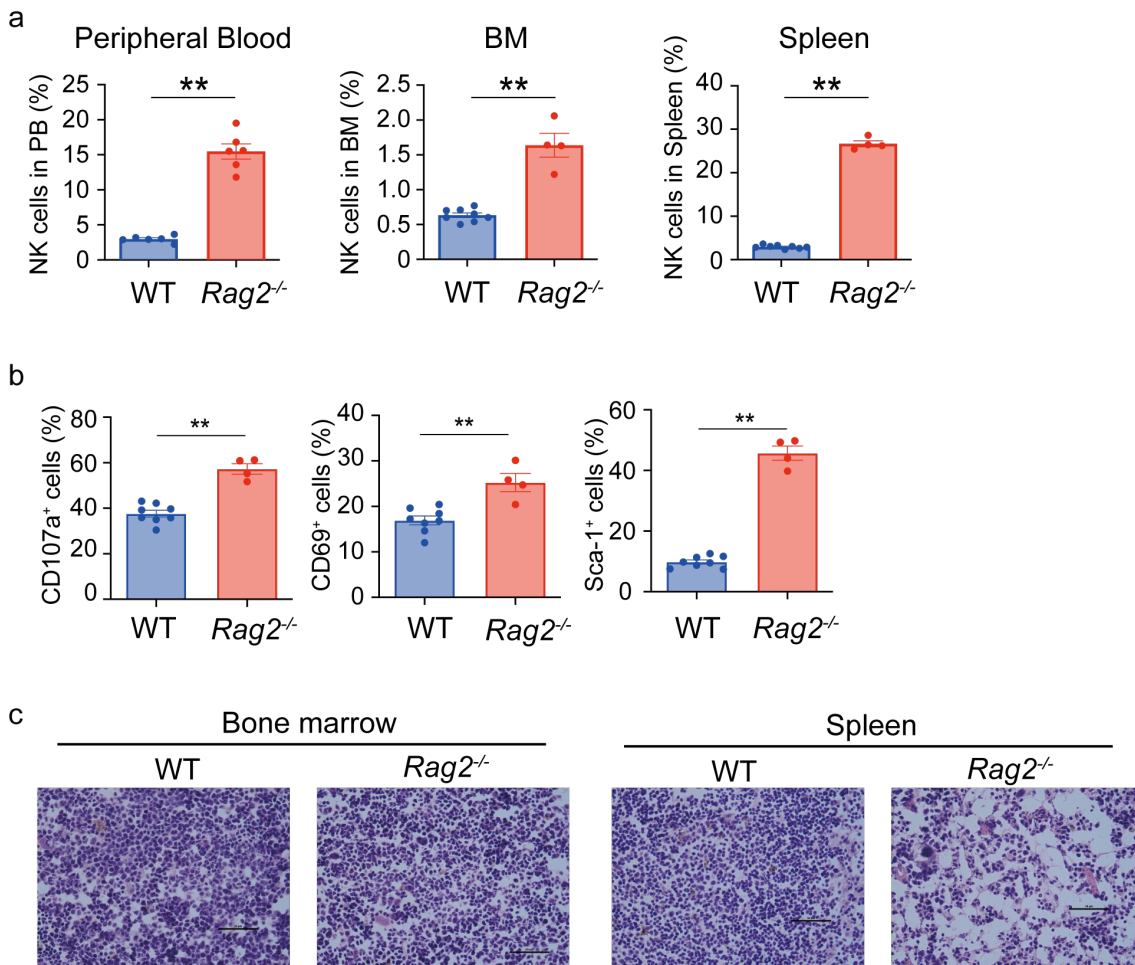

(Relates to Figure 4)

- Frequency of NK cells in peripheral blood (PB), bone marrow (BM, both femurs and tibias) and spleen. Data are means  $\pm$  s.e.m. (PB  $n=6$  per group, BM and spleen WT:  $n=8$ , *Rag2*<sup>-/-</sup>:  $n=4$ , male mice). \*\* $P<0.01$ ; two-tailed Mann Whitney test. See also Figure 4a.
- Expression of NK cell activation markers (CD107a, CD69, Sca-1) in BM-derived NK cells of WT and *Rag2*<sup>-/-</sup> mice. Frequency of CD107a<sup>+</sup>, CD69<sup>+</sup>, Sca-1<sup>+</sup> cells are shown as means  $\pm$  s.e.m. (WT:  $n=8$ , *Rag2*<sup>-/-</sup>:  $n=4$ ). \*\* $P<0.01$ ; two-tailed Mann Whitney test. See also Figure 4b.
- WT and *Rag2*<sup>-/-</sup> mice (male) were transplanted with MLL-AF9 cells and were sacrificed 11 days after transplantation to resect tibiae and spleens. Fixed bone marrow and spleen sections from WT and *Rag2*<sup>-/-</sup> mice were stained with hematoxylin and eosin (H&E). Bars, 50  $\mu\text{m}$ . See also Figure 4f.

### Supplemental Figure 3

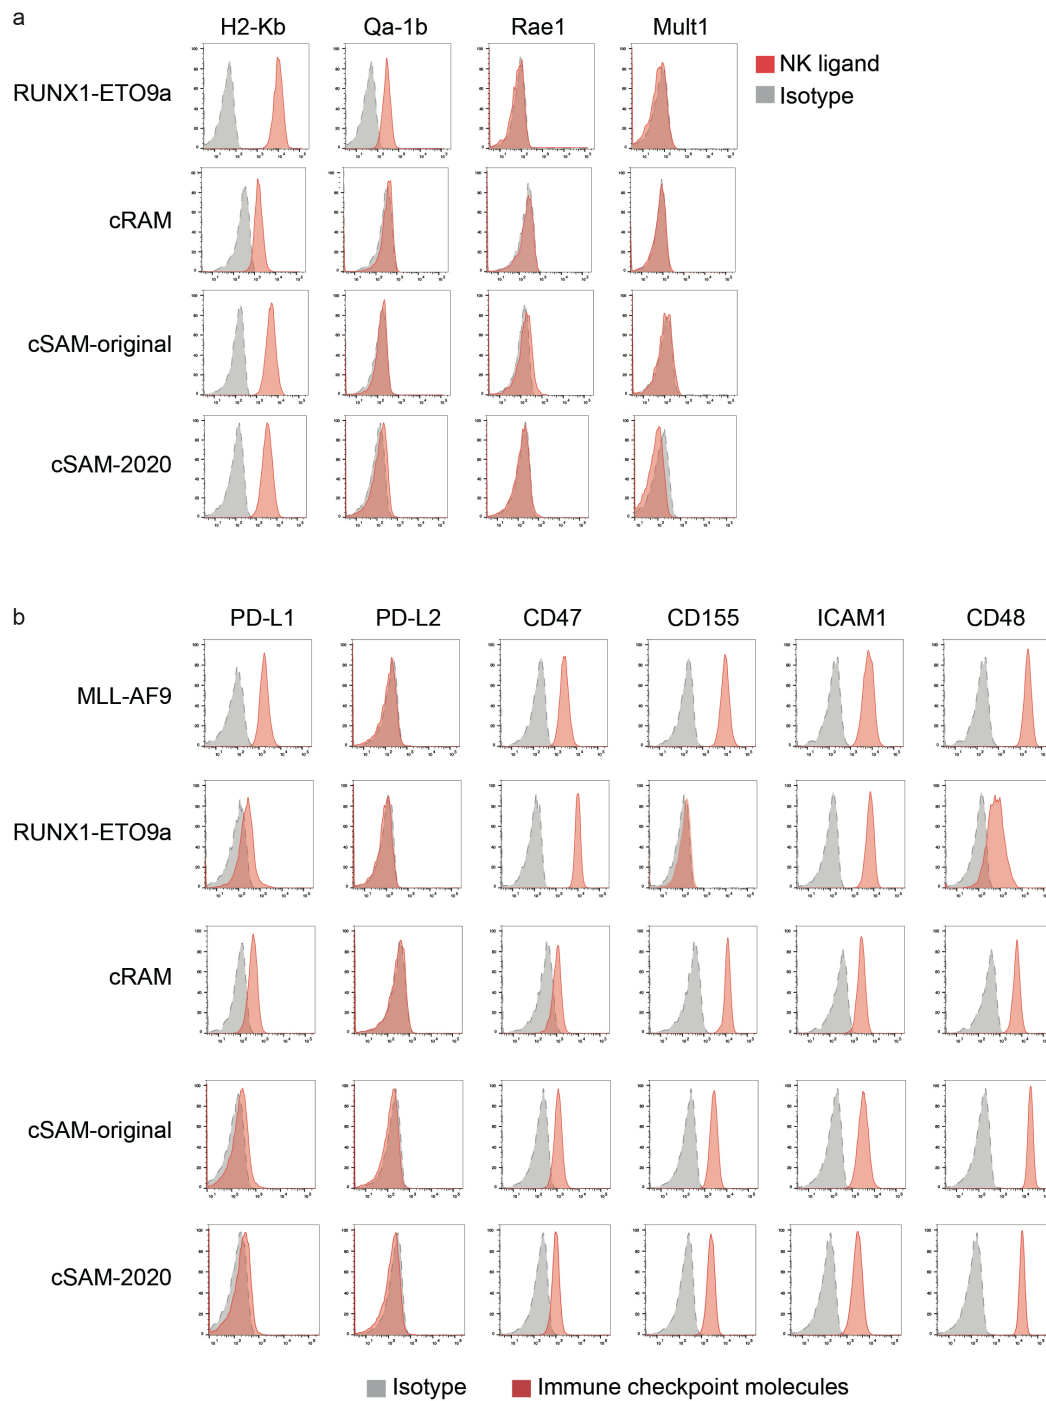

**a.** Flow cytometric analysis of MHC Class I molecules (H2-Kb and Qa-1b) and NKG2D ligands (Rae1 and Mult1) in myeloid neoplasms. Representative histograms are shown. **b.** Flow cytometric analysis of immune checkpoint molecules (PD-L1, PD-L2, CD47, CD155, ICAM1, CD48) in myeloid neoplasms. Representative histograms are shown.

## Supplemental Figure 4: Gating strategy for FACS data

### GFP+ sorting for RNA-seq

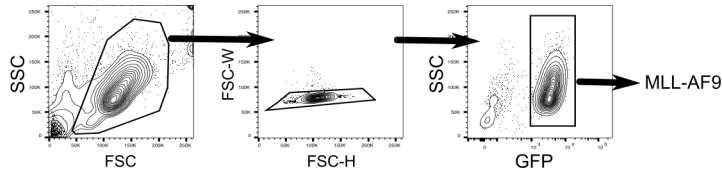

### Gating strategy for NK cell ligand

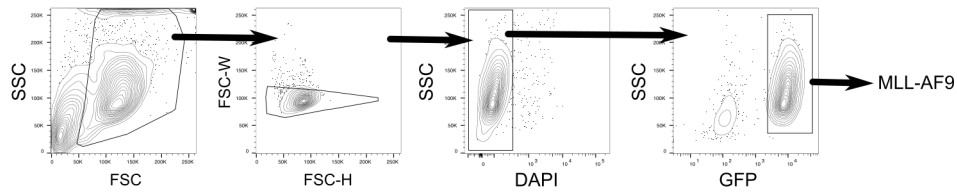

### Gating strategy\_NK cell cytotoxicity assay

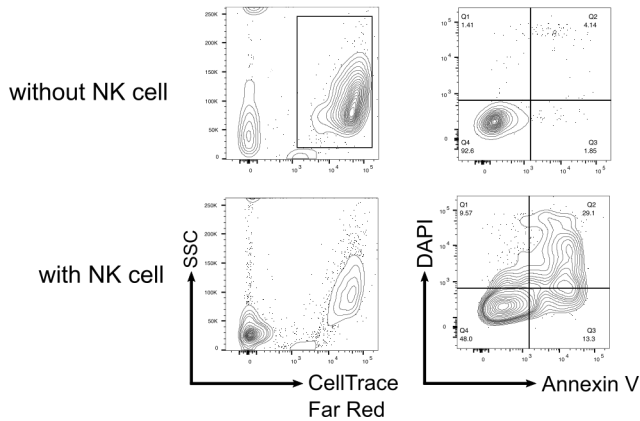

### NK cell\_PB analysis

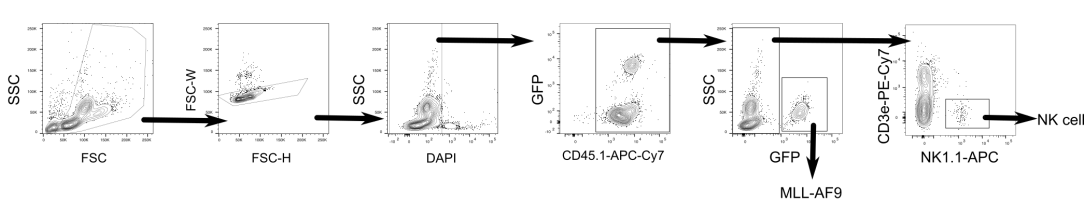

### NK cell\_BM analysis

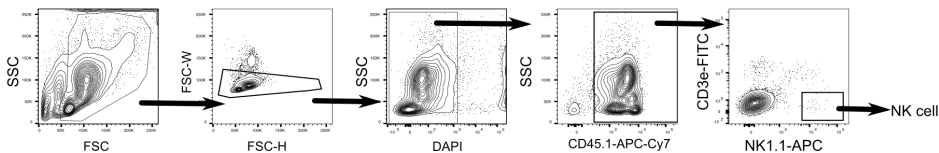

### NK cell\_Spleen analysis

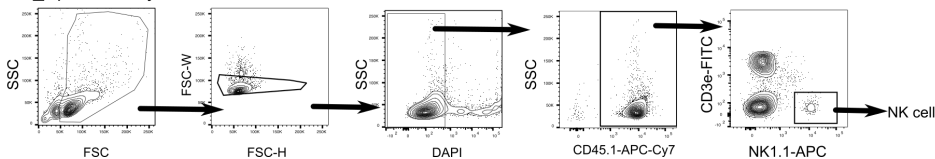

Supplement: 42003_2023_5606_MOESM2_ESM.pdf [file 42003_2023_5606_MOESM2_ESM.pdf]
